# Supplementary material
Source: publisher figshare collection journal article supplement (https://gsapubs.figshare.com/ndownloader/files/23295224)
Supplement: Supplementary file 1 [file 23295224]

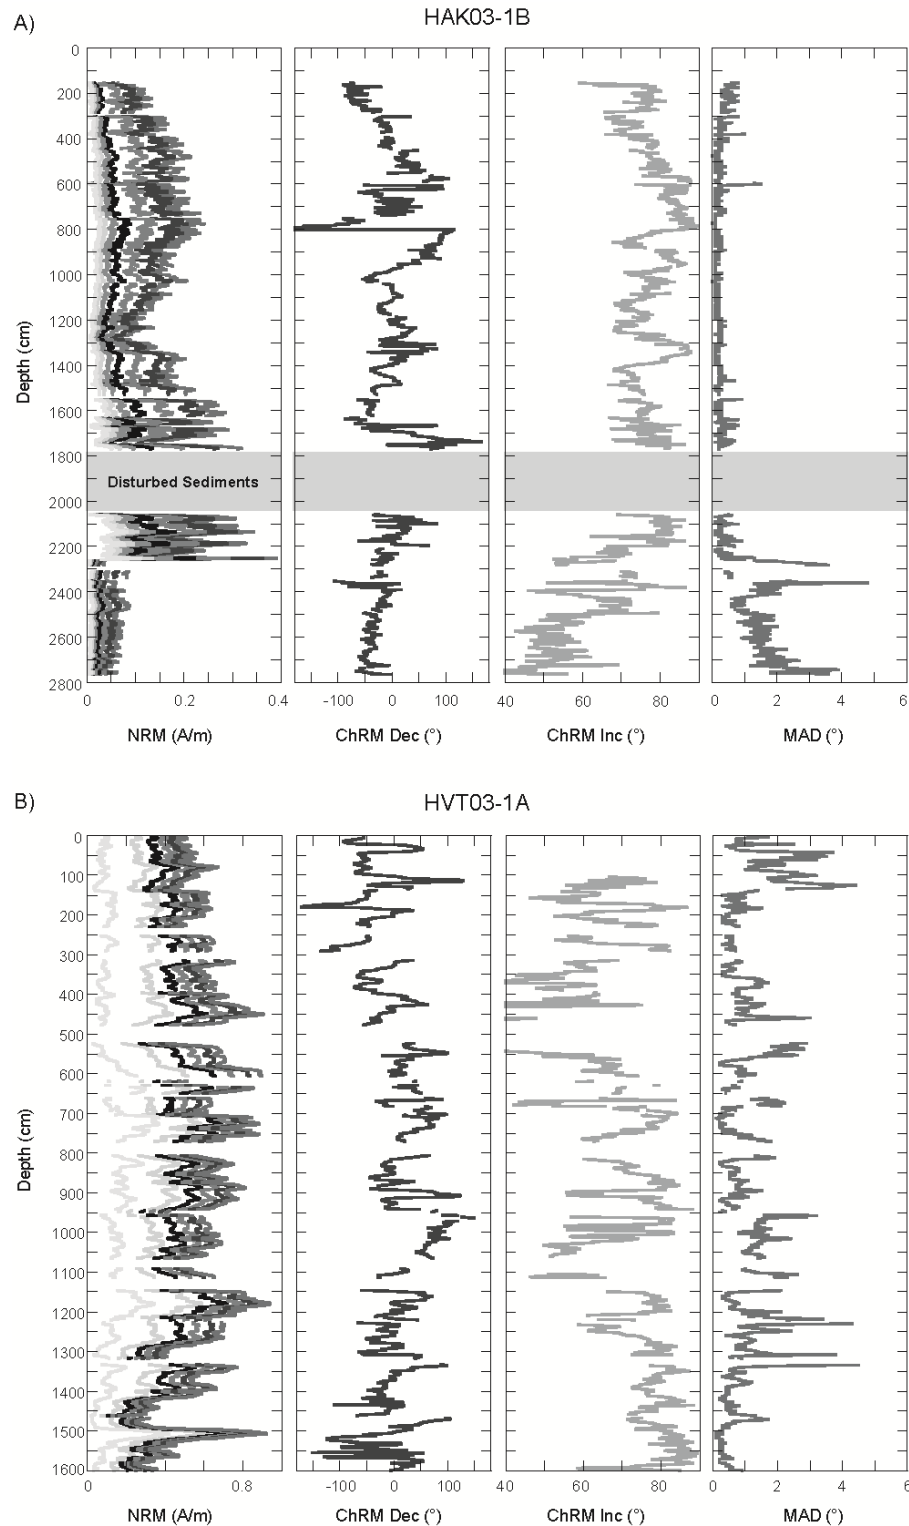

Figure DR1. Down core plot of natural remanent magnetization (NRM) intensity at all demagnetization steps in the 5–60 mT peak field range, declination, inclination and maximum angular deviation (MAD) values.

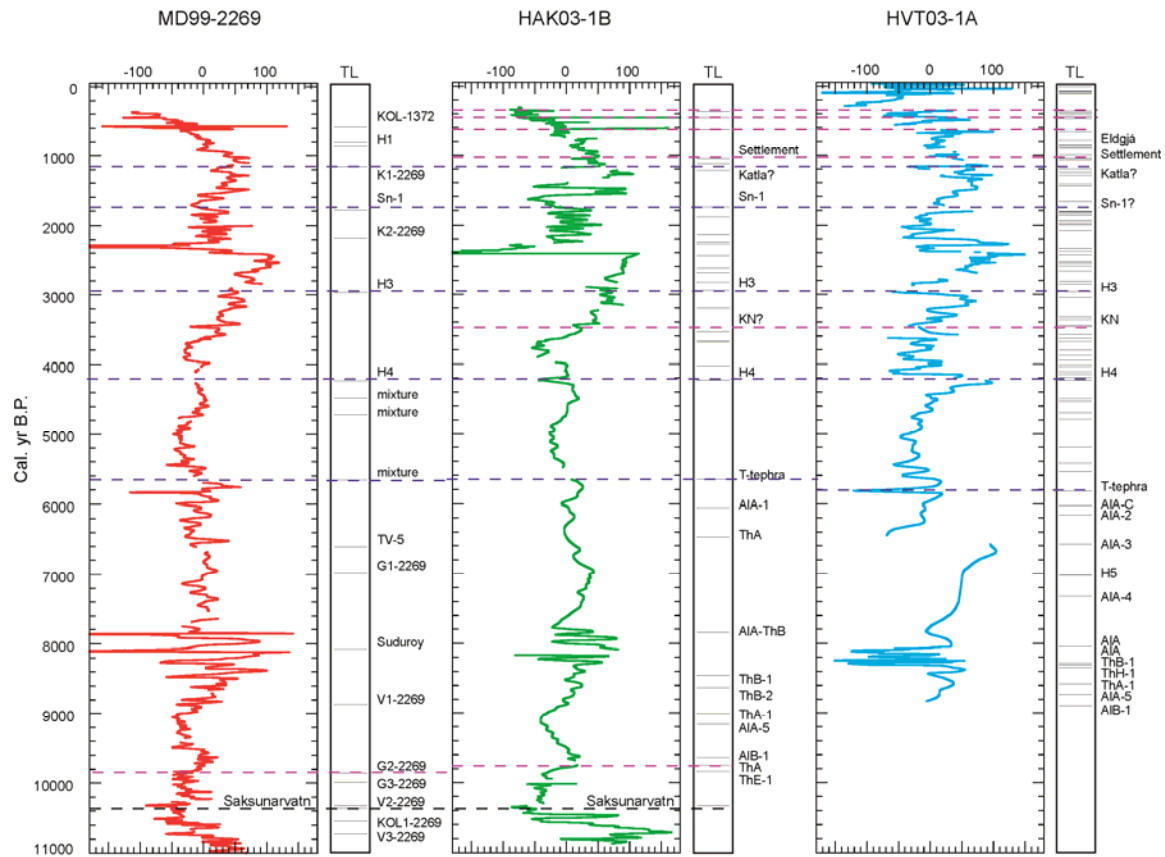

Figure DR2. All tephra layers found in the cores are shown with a gray bar. All identified tephra are labeled. Tephra markers found in all cores are marked with violet dashed line, tephra layers found in two of the cores are labeled with pink dashed line (based on work from Kristjánssdóttir et al., 2007; Jóhannsdóttir, 2006).

Table DR1. Several tephra layers have been identified in the MD99-2269 core, (Kristjánssdóttir et al., 2007), four are used as tie points to the HAK03–1B record and two to the HVT03–1A record.

| Core Identity    | Tephra Sn-1                   | Tephra H3                     | Tephra H4                     | Tephra Saksunarvatn             | Publication                                                       |
|------------------|-------------------------------|-------------------------------|-------------------------------|---------------------------------|-------------------------------------------------------------------|
| <b>MD99-2269</b> | Cal. age yr B.P.<br>1944-2098 | Cal. age yr B.P.<br>3073-3255 | Cal. age yr B.P.<br>4407-4571 | Cal. age yr B.P.<br>10284-10501 | Kristjánssdóttir et al., 2007                                     |
| <b>HAK03-1B</b>  | x                             | x                             | x                             | x                               | Jóhannsdóttir et al., 2006;<br>Thordarson, personal communication |
| <b>HVT03-1A</b>  |                               | x                             | x                             |                                 | Jóhannsdóttir et al., 2006<br>Thordarson, personal communication  |
